# Supplementary material for: Multi-class chemical exposure in rural Peru using silicone wristbands
Source: PubMed Central journal article supplement (PMC5658680; doi:10.1038/jes.2017.12), 2017-07-26
Supplement: jes201712x2.pdf [file jes201712x2.pdf]

Table S2. Chemicals detected in silicone wristbands with GC-MS screen and summarized by demographic.

| Class                 | Compound                            | CASRN <sup>a</sup> | Total #<br>detections | community |       |         |         | gender |      | occupation     |       | age    |         |         |         |         |
|-----------------------|-------------------------------------|--------------------|-----------------------|-----------|-------|---------|---------|--------|------|----------------|-------|--------|---------|---------|---------|---------|
|                       |                                     |                    |                       | Moyobamba | Rioja | Tingana | Yantalo | Female | Male | Farm<br>Worker | Other | 0 - 13 | 13 - 28 | 28 - 43 | 43 - 58 | 58 - 73 |
| Plasticizer           | bis (2-ethylhexyl) phthalate        | 117-81-7           | 68                    | 15        | 15    | 13      | 25      | 35     | 33   | 25             | 43    | 9      | 16      | 14      | 19      | 10      |
|                       | butyl benzyl phthalate              | 85-68-7            | 39                    | 9         | 5     | 9       | 16      | 19     | 20   | 15             | 24    | 4      | 9       | 9       | 11      | 6       |
|                       | dicyclohexyl phthalate              | 84-61-7            | 54                    | 12        | 12    | 10      | 20      | 27     | 27   | 21             | 33    | 9      | 13      | 10      | 14      | 8       |
|                       | diethyl phthalate                   | 84-66-2            | 64                    | 15        | 14    | 13      | 22      | 33     | 31   | 23             | 41    | 8      | 16      | 13      | 17      | 10      |
|                       | diisobutyl phthalate                | 84-69-5            | 65                    | 14        | 15    | 13      | 23      | 32     | 33   | 25             | 40    | 9      | 13      | 14      | 19      | 10      |
|                       | dimethyl phthalate                  | 131-11-3           | 2                     | ---       | ---   | ---     | 2       | 1      | 1    | 1              | 1     | ---    | ---     | 1       | ---     | 1       |
|                       | di-n-butyl phthalate                | 84-74-2            | 68                    | 15        | 15    | 13      | 25      | 35     | 33   | 25             | 43    | 9      | 16      | 14      | 19      | 10      |
|                       | di-n-hexyl phthalate                | 84-75-3            | 4                     | 1         | ---   | 1       | 2       | 2      | 2    | 1              | 3     | 2      | ---     | ---     | 1       | 1       |
|                       | di-n-nonyl phthalate                | 84-76-4            | 15                    | 3         | 3     | 5       | 4       | 4      | 11   | 8              | 7     | 2      | 4       | 3       | 5       | 1       |
|                       | di-n-octyl phthalate                | 117-84-0           | 3                     | 3         | ---   | ---     | ---     | 1      | 2    | ---            | 3     | 1      | 2       | ---     | ---     | ---     |
| di-n-propyl phthalate | 131-16-8                            | 2                  | 1                     | ---       | ---   | 1       | 2       | ---    | ---  | 2              | 1     | ---    | ---     | 1       | ---     |         |
| Industrial            | 2,4-dichlorophenol                  | 120-83-2           | 4                     | 1         | 1     | 1       | 1       | 2      | 2    | 2              | 2     | ---    | 1       | 2       | ---     | 1       |
|                       | 3,5-dichloroaniline                 | 626-43-7           | 4                     | 1         | ---   | ---     | 3       | 3      | 1    | ---            | 4     | 1      | 2       | 1       | ---     | ---     |
|                       | 3-chloro-4-fluoroaniline            | 367-21-5           | 1                     | ---       | ---   | ---     | 1       | 1      | ---  | ---            | 1     | ---    | 1       | ---     | ---     | ---     |
|                       | 3-chloroaniline                     | 108-42-9           | 8                     | 3         | 1     | 2       | 2       | 5      | 3    | 3              | 5     | 1      | 2       | 4       | ---     | 1       |
|                       | 4-chlorophenol                      | 106-48-9           | 6                     | 1         | 2     | 2       | 1       | 2      | 4    | 3              | 3     | 1      | 3       | ---     | 2       | ---     |
|                       | 4H-cyclopenta[def]phenanthren-4-one | 5737-13-3          | 1                     | ---       | 1     | ---     | ---     | 1      | ---  | 1              | ---   | ---    | 1       | ---     | ---     | ---     |
|                       | 4-methylphenol                      | 106-44-5           | 11                    | ---       | 4     | 4       | 3       | 2      | 9    | 9              | 2     | ---    | 3       | ---     | 4       | 4       |
|                       | 9-fluorenone                        | 486-25-9           | 7                     | ---       | 1     | 2       | 4       | 5      | 2    | 3              | 4     | ---    | 2       | 2       | 2       | 1       |
|                       | biphenyl                            | 92-52-4            | 4                     | ---       | 1     | 1       | 2       | 3      | 1    | 1              | 3     | ---    | 1       | 1       | 1       | 1       |
|                       | dibenzofuran                        | 132-64-9           | 4                     | ---       | 1     | 2       | 1       | 3      | 1    | 2              | 2     | ---    | ---     | 1       | 2       | 1       |
|                       | diphenylamine                       | 122-39-4           | 1                     | ---       | 1     | ---     | ---     | ---    | 1    | ---            | ---   | 1      | ---     | ---     | ---     | ---     |
|                       | sulfur (S <sub>8</sub> )            | 10544-50-0         | 1                     | ---       | ---   | ---     | 1       | ---    | 1    | ---            | ---   | 1      | ---     | ---     | ---     | ---     |
|                       | <i>m</i> -cresol                    | 108-39-4           | 1                     | ---       | ---   | 1       | ---     | ---    | 1    | ---            | ---   | ---    | ---     | ---     | 1       | ---     |
| Flame retardant       | tributyl phosphate                  | 126-73-8           | 1                     | ---       | ---   | ---     | 1       | 1      | ---  | ---            | 1     | ---    | ---     | ---     | ---     | 1       |
|                       | triphenyl phosphate                 | 115-86-6           | 38                    | 10        | 6     | 4       | 18      | 22     | 16   | 8              | 30    | 6      | 8       | 8       | 10      | 6       |
|                       | tris (2-butoxyethyl) phosphate      | 78-51-3            | 1                     | 1         | ---   | ---     | ---     | ---    | 1    | ---            | 1     | ---    | 1       | ---     | ---     | ---     |
|                       | tris (2-ethylhexyl) phosphate       | 78-42-2            | 1                     | ---       | ---   | ---     | 1       | ---    | 1    | ---            | 1     | ---    | ---     | ---     | 1       | ---     |
|                       | tris (3-chloropropyl) phosphate     | 26248-87-3         | 5                     | 2         | ---   | 1       | 2       | 2      | 3    | 1              | 4     | 2      | ---     | ---     | 2       | 1       |
| PCPP                  | benzophenone                        | 119-61-9           | 31                    | 12        | 3     | 3       | 13      | 20     | 11   | 5              | 26    | 8      | 9       | 5       | 8       | 1       |
|                       | benzyl benzoate                     | 120-51-4           | 18                    | 7         | 1     | 2       | 8       | 11     | 7    | 4              | 14    | 2      | 3       | 5       | 6       | 2       |
|                       | butylated hydroxyanisole            | 25013-16-5         | 16                    | 7         | 2     | 1       | 6       | 14     | 2    | 2              | 14    | 4      | 3       | 4       | 4       | 1       |
|                       | caffeine                            | 58-08-2            | 38                    | 10        | 7     | 7       | 14      | 19     | 19   | 13             | 25    | 4      | 8       | 6       | 14      | 6       |
|                       | cashmeran                           | 33704-61-9         | 2                     | ---       | 1     | ---     | 1       | 2      | ---  | 1              | 1     | 1      | ---     | 1       | ---     | ---     |
|                       | celestolide                         | 13171-00-1         | 2                     | 1         | ---   | ---     | 1       | 2      | ---  | ---            | 2     | ---    | ---     | 2       | ---     | ---     |
|                       | eugenol                             | 97-53-0            | 20                    | 5         | 4     | 2       | 9       | 16     | 4    | 6              | 14    | 2      | 3       | 3       | 6       | 6       |
|                       | galaxolide                          | 1222-05-5          | 66                    | 15        | 15    | 13      | 23      | 35     | 31   | 23             | 43    | 9      | 16      | 14      | 18      | 9       |
|                       | musk amberette                      | 83-66-9            | 1                     | ---       | ---   | ---     | 1       | ---    | 1    | ---            | ---   | ---    | ---     | ---     | ---     | 1       |
|                       | musk ketone                         | 81-14-1            | 21                    | 11        | 1     | 1       | 8       | 17     | 4    | 2              | 19    | 2      | 7       | 7       | 3       | 2       |
|                       | nicotine                            | 54-11-5            | 5                     | 1         | 1     | 3       | ---     | 2      | 3    | 4              | 1     | 1      | ---     | ---     | 4       | ---     |
|                       | thymol                              | 89-83-8            | 6                     | ---       | 2     | ---     | 4       | 4      | 2    | 1              | 5     | 1      | 2       | 2       | 1       | ---     |
|                       | tonalide                            | 1506-02-1          | 60                    | 15        | 8     | 13      | 24      | 33     | 27   | 20             | 40    | 9      | 14      | 13      | 17      | 7       |
|                       | traseolide                          | 68140-48-7         | 1                     | 1         | ---   | ---     | ---     | 1      | ---  | ---            | 1     | ---    | 1       | ---     | ---     | ---     |
|                       | triclosan                           | 3380-34-5          | 16                    | 6         | 1     | 5       | 4       | 6      | 10   | 6              | 10    | 3      | 4       | 3       | 4       | 2       |
| PAH                   | 1,2-dimethylnaphthalene             | 573-98-8           | 2                     | ---       | 1     | ---     | 1       | 1      | 1    | 1              | 1     | ---    | 1       | ---     | 1       | ---     |
|                       | 1,6-dimethylnaphthalene             | 575-43-9           | 1                     | ---       | ---   | ---     | 1       | 1      | ---  | ---            | 1     | ---    | 1       | ---     | ---     | ---     |
|                       | 1-methylnaphthalene                 | 90-12-0            | 9                     | ---       | 3     | 1       | 5       | 5      | 4    | 4              | 5     | 1      | 2       | 1       | 2       | 3       |
|                       | 1-methylphenanthrene                | 832-69-9           | 25                    | ---       | 8     | 5       | 12      | 12     | 13   | 12             | 13    | 3      | 8       | 3       | 8       | 3       |
|                       | 1-methylpyrene                      | 2381-21-7          | 2                     | ---       | 2     | ---     | ---     | 1      | 1    | 1              | 1     | 1      | ---     | ---     | 1       | ---     |
|                       | 2,6-diethylnaphthalene              | 59919-41-4         | 5                     | ---       | 2     | ---     | 3       | 2      | 3    | 1              | 4     | 2      | 1       | ---     | 1       | 1       |
|                       | 2,6-dimethylnaphthalene             | 581-42-0           | 3                     | ---       | 1     | ---     | 2       | 1      | 2    | 2              | 1     | ---    | 1       | ---     | 1       | 1       |
|                       | 2-ethylnaphthalene                  | 939-27-5           | 2                     | ---       | 1     | ---     | 1       | 1      | 1    | 1              | 1     | ---    | 1       | ---     | 1       | ---     |
|                       | 2-methylantracene                   | 613-12-7           | 6                     | ---       | 2     | 1       | 3       | 4      | 2    | 3              | 3     | ---    | 4       | ---     | 1       | 1       |

Table S1. Chemicals detected in silicone wristbands with GC-MS screen and summarized by demographic.cont.

| Class       | Compound                          | CASRN <sup>a</sup> | Total #<br>detections | community |       |         |         | gender |      | occupation |       | age    |         |         |         |         |
|-------------|-----------------------------------|--------------------|-----------------------|-----------|-------|---------|---------|--------|------|------------|-------|--------|---------|---------|---------|---------|
|             |                                   |                    |                       | Moyobamba | Rioja | Tingana | Yantalo | Female | Male | Worker     | Other | 0 - 13 | 13 - 28 | 28 - 43 | 43 - 58 | 58 - 73 |
|             | 2-methylnaphthalene               | 91-57-6            | 3                     | ---       | 2     | ---     | 1       | 1      | 2    | 1          | 2     | ---    | 1       | ---     | ---     | 2       |
|             | 2-methylphenanthrene              | 2531-84-2          | 22                    | ---       | 8     | 2       | 12      | 11     | 11   | 10         | 12    | 4      | 5       | 4       | 6       | 3       |
|             | 3,6-dimethylphenanthrene          | 1576-67-6          | 7                     | ---       | 4     | ---     | 3       | 2      | 5    | 3          | 4     | 1      | 1       | ---     | 4       | 1       |
|             | 9-methylanthracene                | 779-02-2           | 1                     | ---       | ---   | ---     | 1       | 1      | ---  | ---        | 1     | ---    | 1       | ---     | ---     | ---     |
|             | acenaphthylene                    | 208-96-8           | 13                    | ---       | 1     | 3       | 9       | 11     | 2    | 4          | 9     | 2      | 4       | 2       | 3       | 2       |
|             | anthracene                        | 120-12-7           | 46                    | 10        | 8     | 10      | 18      | 26     | 20   | 16         | 30    | 8      | 12      | 8       | 13      | 5       |
|             | benzo[ <i>a</i> ]anthracene       | 56-55-3            | 7                     | ---       | 3     | 1       | 3       | 6      | 1    | 2          | 5     | 1      | 3       | 1       | 1       | 1       |
|             | benzo[ <i>a</i> ]fluorene         | 238-84-6           | 2                     | ---       | 1     | 1       | ---     | 1      | 1    | 2          | ---   | ---    | 2       | ---     | ---     | ---     |
|             | benzo[ <i>b</i> ]fluorene         | 243-17-4           | 2                     | ---       | 1     | ---     | 1       | 2      | ---  | 1          | 1     | ---    | 2       | ---     | ---     | ---     |
|             | benzo[ <i>e</i> ]pyrene           | 192-97-2           | 1                     | ---       | 1     | ---     | ---     | 1      | ---  | 1          | ---   | ---    | 1       | ---     | ---     | ---     |
|             | chrysene                          | 218-01-9           | 1                     | ---       | 1     | ---     | ---     | 1      | ---  | 1          | ---   | ---    | 1       | ---     | ---     | ---     |
|             | cyclopenta[ <i>cd</i> ]pyrene     | 27208-37-3         | 2                     | ---       | 2     | ---     | ---     | 2      | ---  | 1          | 1     | ---    | 1       | ---     | ---     | 1       |
|             | dibenzothiophene                  | 132-65-0           | 1                     | ---       | 1     | ---     | ---     | ---    | 1    | 1          | ---   | ---    | ---     | ---     | 1       | ---     |
|             | fluoranthene                      | 206-44-0           | 40                    | 5         | 10    | 10      | 15      | 21     | 19   | 16         | 24    | 8      | 8       | 8       | 10      | 6       |
|             | fluorene                          | 86-73-7            | 16                    | 1         | 5     | 2       | 8       | 10     | 6    | 6          | 10    | 1      | 6       | 3       | 2       | 4       |
|             | naphthalene                       | 91-20-3            | 16                    | 6         | 2     | ---     | 8       | 13     | 3    | 1          | 15    | 5      | 4       | 2       | 1       | 4       |
|             | phenanthrene                      | 85-01-8            | 27                    | 2         | 9     | 7       | 9       | 15     | 12   | 14         | 13    | 2      | 6       | 8       | 6       | 5       |
|             | pyrene                            | 129-00-0           | 30                    | 4         | 6     | 7       | 13      | 17     | 13   | 12         | 18    | 5      | 9       | 3       | 9       | 4       |
|             | retene                            | 483-65-8           | 4                     | ---       | 3     | ---     | 1       | 2      | 2    | 1          | 3     | 1      | ---     | ---     | 2       | 1       |
|             | triphenylene                      | 217-59-4           | 1                     | ---       | 1     | ---     | ---     | 1      | ---  | ---        | 1     | ---    | ---     | ---     | ---     | 1       |
| Insecticide | promecarb artifact                | 3228-03-3          | 5                     | ---       | 1     | 2       | 2       | 2      | 3    | 2          | 3     | 1      | 2       | 1       | 1       | ---     |
|             | bendiocarb                        | 22781-23-3         | 1                     | ---       | ---   | ---     | 1       | ---    | 1    | 1          | ---   | ---    | ---     | ---     | ---     | 1       |
|             | benzoximate metabolite            | 55440-55-6         | 1                     | ---       | ---   | ---     | 1       | 1      | ---  | ---        | 1     | ---    | ---     | ---     | 1       | ---     |
|             | bioallethrin                      | 584-79-2           | 1                     | ---       | 1     | ---     | ---     | 1      | ---  | ---        | 1     | ---    | ---     | 1       | ---     | ---     |
|             | chlorpyrifos                      | 2921-88-2          | 18                    | ---       | 8     | 3       | 7       | 8      | 10   | 10         | 8     | 2      | 2       | 3       | 6       | 5       |
|             | cyhalothrin (gamma)               | 76703-62-3         | 1                     | ---       | ---   | ---     | 1       | ---    | 1    | 1          | ---   | ---    | ---     | ---     | 1       | ---     |
|             | cyhalothrin (lambda)              | 68085-85-8         | 1                     | ---       | ---   | ---     | 1       | ---    | 1    | 1          | ---   | ---    | ---     | ---     | 1       | ---     |
|             | cypermethrin I                    | 52315-07-8         | 1                     | ---       | 1     | ---     | ---     | ---    | 1    | 1          | ---   | ---    | ---     | ---     | ---     | 1       |
|             | cypermethrin II                   | 52315-07-8         | 3                     | 1         | 1     | ---     | 1       | ---    | 3    | 1          | 2     | ---    | ---     | 1       | 1       | 1       |
|             | cypermethrin III                  | 52315-07-8         | 1                     | 1         | ---   | ---     | ---     | 1      | ---  | ---        | 1     | ---    | 1       | ---     | ---     | ---     |
|             | cyphenothrin-cis                  | 39515-40-7         | 2                     | ---       | ---   | ---     | 2       | ---    | 2    | 1          | 1     | 1      | ---     | ---     | ---     | 1       |
|             | cyphenothrin-trans                | 39515-40-7         | 1                     | ---       | ---   | ---     | 1       | ---    | 1    | ---        | 1     | 1      | ---     | ---     | ---     | ---     |
|             | dichlorvos                        | 62-73-7            | 2                     | ---       | ---   | ---     | 2       | 2      | ---  | ---        | 2     | ---    | 2       | ---     | ---     | ---     |
|             | dimethoate                        | 60-51-5            | 1                     | ---       | ---   | ---     | 1       | ---    | 1    | ---        | 1     | ---    | ---     | ---     | 1       | ---     |
|             | fenprolifer                       | 120068-37-3        | 1                     | ---       | ---   | ---     | 1       | 1      | ---  | ---        | 1     | ---    | ---     | ---     | ---     | 1       |
|             | malathion                         | 121-75-5           | 1                     | ---       | ---   | ---     | 1       | ---    | 1    | 1          | ---   | ---    | ---     | ---     | ---     | 1       |
|             | methamidophos                     | 10265-92-6         | 1                     | ---       | ---   | 1       | ---     | ---    | 1    | 1          | ---   | ---    | ---     | 1       | ---     | ---     |
|             | N,N'-diethyl- <i>m</i> -toluamide | 134-62-3           | 30                    | 5         | 2     | 10      | 13      | 13     | 17   | 15         | 15    | 2      | 7       | 6       | 9       | 6       |
|             | <i>p,p'</i> -DDD                  | 72-54-8            | 10                    | 1         | 1     | 4       | 4       | 3      | 7    | 6          | 4     | 1      | ---     | 1       | 4       | 4       |
|             | <i>p,p'</i> -DDE                  | 72-55-9            | 14                    | 3         | 1     | 5       | 5       | 3      | 11   | 7          | 7     | 1      | ---     | 3       | 6       | 4       |
|             | <i>p,p'</i> -DDT                  | 50-29-3            | 14                    | ---       | ---   | 6       | 8       | 4      | 10   | 9          | 5     | 1      | 1       | 1       | 6       | 5       |
|             | permethrin-cis                    | 52645-53-1         | 2                     | ---       | ---   | ---     | 2       | 2      | ---  | ---        | 2     | ---    | 1       | ---     | ---     | 1       |
|             | permethrin-trans                  | 61949-77-7         | 1                     | ---       | ---   | ---     | 1       | 1      | ---  | ---        | 1     | ---    | ---     | ---     | ---     | 1       |
|             | piperonyl butoxide                | 51-03-6            | 9                     | ---       | ---   | 3       | 6       | 3      | 6    | 5          | 4     | 1      | 1       | 1       | 4       | 2       |
|             | pirimiphos-methyl                 | 29232-93-7         | 3                     | 3         | ---   | ---     | ---     | 2      | 1    | ---        | 3     | 1      | ---     | 2       | ---     | ---     |
|             | promecarb                         | 2631-37-0          | 5                     | 3         | ---   | ---     | 2       | 4      | 1    | 1          | 4     | ---    | 2       | 2       | 1       | ---     |
| Herbicide   | diuron metabolite                 | 102-36-3           | 13                    | 4         | 2     | 1       | 6       | 6      | 7    | 4          | 9     | 2      | 5       | 4       | ---     | 2       |
|             | butachlor                         | 23184-66-9         | 12                    | ---       | 9     | ---     | 3       | 6      | 6    | 4          | 8     | 2      | 4       | 2       | 2       | 2       |
|             | difenoxuron                       | 14214-32-5         | 1                     | 1         | ---   | ---     | ---     | 1      | ---  | ---        | 1     | ---    | ---     | ---     | ---     | 1       |
|             | terbutryn                         | 886-50-0           | 1                     | ---       | ---   | ---     | 1       | 1      | ---  | ---        | 1     | ---    | 1       | ---     | ---     | ---     |
| Fungicide   | cyprodinil                        | 121552-61-2        | 1                     | 1         | ---   | ---     | ---     | ---    | 1    | ---        | 1     | 1      | ---     | ---     | ---     | ---     |
|             | tebuconazole                      | 107534-96-3        | 7                     | ---       | 7     | ---     | ---     | 3      | 4    | 3          | 4     | 1      | 3       | 2       | 1       | ---     |
|             | trifloxystrobin                   | 141517-21-7        | 9                     | ---       | 8     | ---     | 1       | 4      | 5    | 4          | 5     | 1      | 3       | 3       | 2       | ---     |

<sup>a</sup> CASRN was not always available for individual isomers.
